# Supplementary material for: A Phase I Trial of Dasatinib and Osimertinib in TKI Naïve Patients With Advanced EGFR-Mutant Non-Small-Cell Lung Cancer
Source: Frontiers journal article supplement (doi:10.3389/fonc.2021.728155), 2021-09-08
Supplement: Data_Sheet_2.PDF [file Data_Sheet_2.PDF]

**Supplemental Table 1. Days on each dose level of dasatinib (number of days off dasatinib due to dose interruption secondary to adverse events in parenthesis)**

| Patient ID | Dose level | Days on 70 mg twice daily (dose level 2) | Days on 50 mg twice daily (dose level 1) | Days on 70 mg once daily (dose level -1) | Days on 50 mg once daily (dose level -2) |
|------------|------------|------------------------------------------|------------------------------------------|------------------------------------------|------------------------------------------|
| 1          | 1          |                                          | 86 (8)                                   | 46 (20)                                  | 687 (7)                                  |
| 2          | 1          |                                          | 279 (0)                                  | 65 (11)                                  | 462 (49)                                 |
| 3          | 1          |                                          | 84 (0)                                   | 28 (0)                                   | 1305 (43)*                               |
| 4          | 2          | 81 (0)                                   |                                          |                                          |                                          |
| 5          | 2          | 70 (9)                                   | 28 (3)                                   | 21 (0)                                   |                                          |
| 6          | 2          | 19 (12)                                  | 15 (5)                                   | 21 (8)                                   | 245 (29)                                 |
| 7          | 1          |                                          | 5 (3)                                    | 52 (14)                                  | 697 (82)                                 |
| 8          | 1          |                                          | 63 (28)                                  | 26 (6)                                   | 864 (59 <sup>†</sup> )*                  |
| 9          | 1          |                                          | 14 (5)                                   | 28 (4)                                   | 70 (0)                                   |
| 10         | -1         |                                          |                                          | 112 (21)                                 | 221 (0)                                  |

\* Ongoing treatment

<sup>†</sup> Patient was additionally off dasatinib between 3/9/2020 - 5/14/2020 due to the worsening COVID-19 pandemic situation and the concern about neutropenia on dasatinib. Patient has a history of AML now in remission.

**Supplemental Table 2. Reasons for dose reduction and discontinuation.**

| Patient ID | Dose level | Reason for dose reduction from dose level 2 to dose level 1 | Reason for dose reduction from dose level 1 to dose level -1 | Reason for dose reduction from dose level -1 to dose level -2 | Reason for dasatinib discontinuation                                                                           |
|------------|------------|-------------------------------------------------------------|--------------------------------------------------------------|---------------------------------------------------------------|----------------------------------------------------------------------------------------------------------------|
| 1          | 1          |                                                             | Symptomatic atrial fibrillation                              | Symptomatic atrial fibrillation                               | Need for anticoagulation for deep vein thrombosis and drug interaction between the anticoagulant and dasatinib |
| 2          | 1          |                                                             | Pleural effusion                                             | Pleural effusion, fatigue                                     | Pneumonitis                                                                                                    |
| 3          | 1          |                                                             | Fatigue                                                      | Fatigue                                                       |                                                                                                                |
| 4          | 2          |                                                             |                                                              |                                                               | Need for anticoagulation for deep vein thrombosis and drug interaction between the anticoagulant and dasatinib |
| 5          | 2          | Pleural effusion                                            | Pleural effusion                                             |                                                               | Pleural effusion                                                                                               |
| 6          | 2          | Nausea, fever, fluid retention                              | Nausea, fluid retention                                      | Dyspnea, chest heaviness                                      | Pleural effusion                                                                                               |
| 7          | 1          |                                                             | Headaches, myalgia                                           | Pleural effusion                                              |                                                                                                                |
| 8          | 1          |                                                             | QTc prolongation                                             | Neutropenia                                                   |                                                                                                                |
| 9          | 1          |                                                             | Rash                                                         | Creatinine elevation                                          | Disease progression                                                                                            |
| 10         | -1         |                                                             |                                                              | Nausea, anorexia                                              | Disease progression                                                                                            |

**Supplemental Table 3. Subsequent therapies used in patients who were taken off the study**

| Patient ID | Subsequent treatment                                                                             |
|------------|--------------------------------------------------------------------------------------------------|
| 1          | Osimertinib/necitumumab                                                                          |
| 2          | None                                                                                             |
| 4          | Erlotinib<br>Carboplatin/pemetrexed                                                              |
| 5          | Osimertinib/necitumumab<br>Carboplatin/pemetrexed<br>Osimertinib/alectinib                       |
| 6          | Osimertinib/MP0250<br>Carboplatin/pemetrexed/osimertinib                                         |
| 9          | RT to the oligoprogressive lesion, followed by gefitinib<br>Carboplatin/pemetrexed/pembrolizumab |
| 10         | Osimertinib/necitumumab<br>Carboplatin/pemetrexed                                                |

**Supplemental Table 4. Geometric means of osimertinib and AZ13575104 per cycle**

| Time point            | Osimertinib | AZ13575104 |
|-----------------------|-------------|------------|
| Cycle 1 (pre-dose)    | 0.0         | 0.0        |
| Cycle 1 (2 hour post) | 138.4       | 3.6        |
| Cycle 1 (4 hour post) | 222.3       | 7.0        |
| Cycle 1 (6 hour post) | 166.4       | 15.0       |
| Cycle 2 (pre-dose)    | 574.8       | 118.9      |
| Cycle 2 (4 hour post) | 761.3       | 149.3      |
| Cycle 3               | 563.5       | 117.8      |
| Cycle 4               | 478.0       | 158.1      |
| Cycle 5               | 716.0       | 121.9      |
| Cycle 6               | 420.9       | 133.2      |
| Cycle 7               | 384.9       | 121.1      |
| Cycle 8               | 305.0       | 122.5      |
| Cycle 9               | 433.9       | 59.6       |
| Cycle 10              | 275.4       | 45.0       |
| Cycle 11              | 339.6       | 50.2       |
| Cycle 12              | 333.1       | 53.0       |
| Cycle 13              | 262.1       | 63.2       |
| Cycle 14              | 154.4       | 60.5       |
| Cycle 15              | 307.3       | 56.7       |
| Cycle 16              | 113.7       | 38.1       |
| Cycle 17              | 270.0       | 51.7       |
| Cycle 18              | 251.4       | 48.7       |
| Cycle 19              | 145.0       | 25.1       |
| Cycle 20              | 256.6       | 48.7       |
| Cycle 21              | 213.9       | 52.2       |

|           |       |       |
|-----------|-------|-------|
| Cycle 22  | 36.3  | 28.1  |
| Cycle 23  | 132.3 | 45.8  |
| Cycle 24  | 140.0 | 51.1  |
| Cycle 25  | 181.7 | 53.8  |
| Cycle 26  | 208.1 | 59.3  |
| Cycle 27  | 158.4 | 81.0  |
| Cycle 28  | 204.0 | 86.9  |
| Cycle 29  | 57.0  | 21.1  |
| Cycle 30  | 228.6 | 190.0 |
| Cycle 31* | -     | -     |
| Cycle 32* | -     | -     |
| Cycle 33  | 48.0  | 30.0  |
| Cycle 34  | 257.0 | 23.6  |

\* Missing samples for cycle 31 and 32
